# Supplementary material for: The association between family history and genomic burden with schizophrenia mortality: a Swedish population-based register and genetic sample study
Source: PubMed Central journal article supplement (PMC7960991; doi:10.1038/s41398-021-01282-1), 2021-03-15

# Supplementary Figure 1

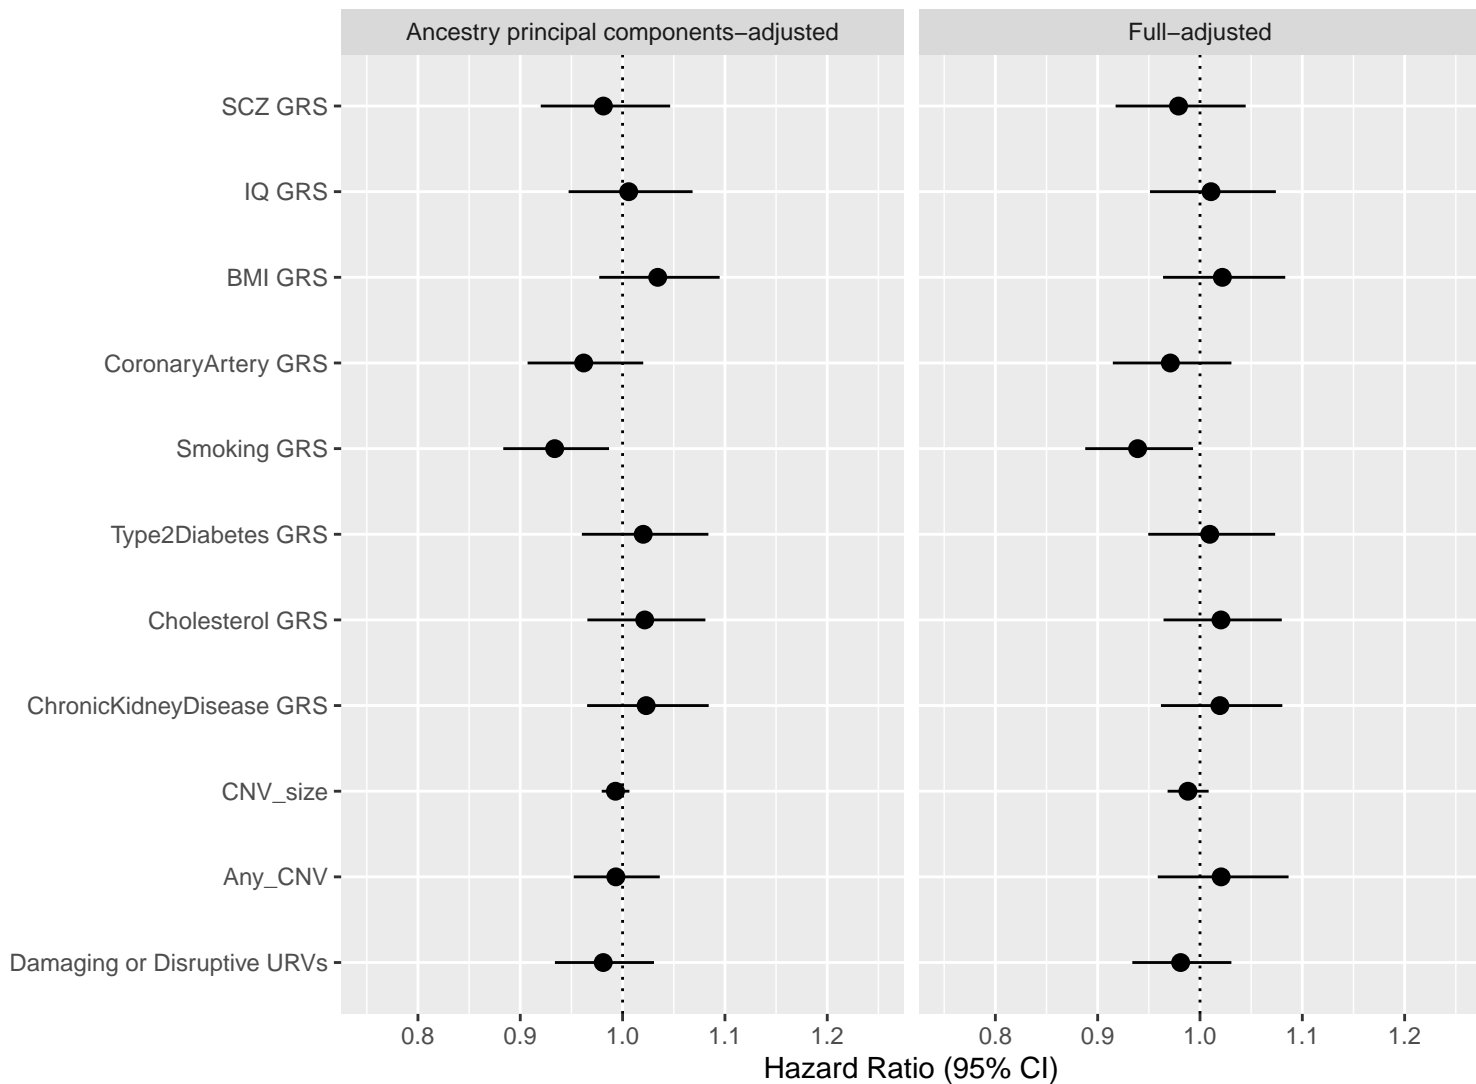

Supplement: 41398_2021_1282_MOESM2_ESM.pdf [file 41398_2021_1282_MOESM2_ESM.pdf]
